# Supplementary material
Source: PubMed Central journal article supplement (PMC4660269)
Supplement: NIHMS729607-supplement-1.pdf [file NIHMS729607-supplement-1.pdf]

## FIGURE S1 (related to Figure 1)

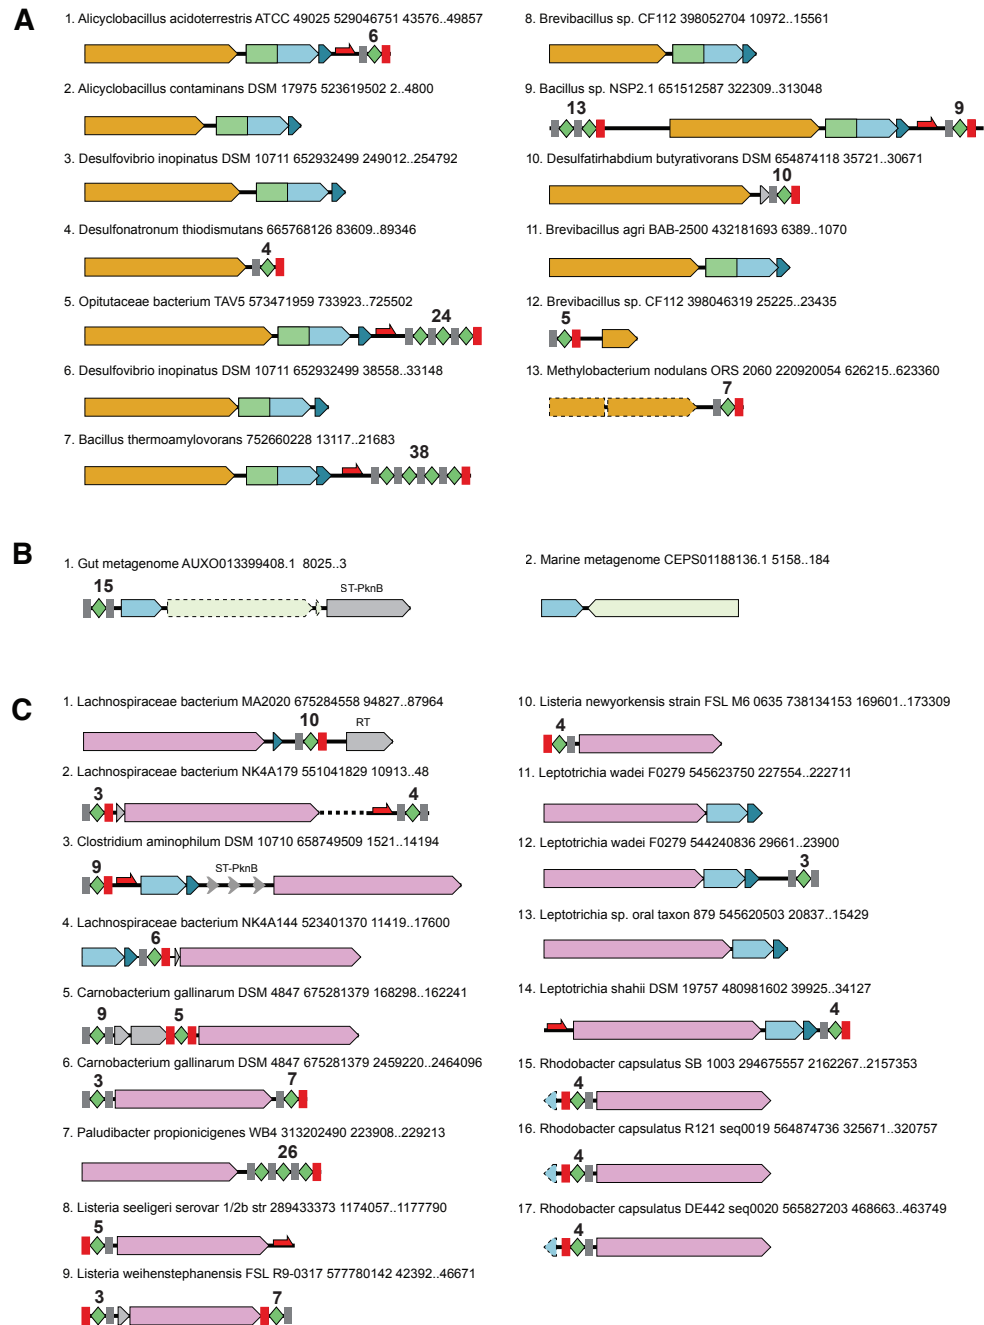

**Figure S1 | Genomic architectures of all identified candidate novel CRISPR-Cas loci.**

(A) The C2c1 loci (subtype V-B). (B) The C2c3 loci (subtype V-C). (C) The C2c2 loci (type VI). Genes are colored according to the schematic in Figure 2. The number of repeats in CRISPR arrays is indicated. For each genomic contig, Genbank numeric ID and the coordinates of the locus are indicated. Additional designations: ST-PknB, serine/threonine protein kinase; RT, reverse transcriptase.



**FIGURE S3 (related to Figure 2)**

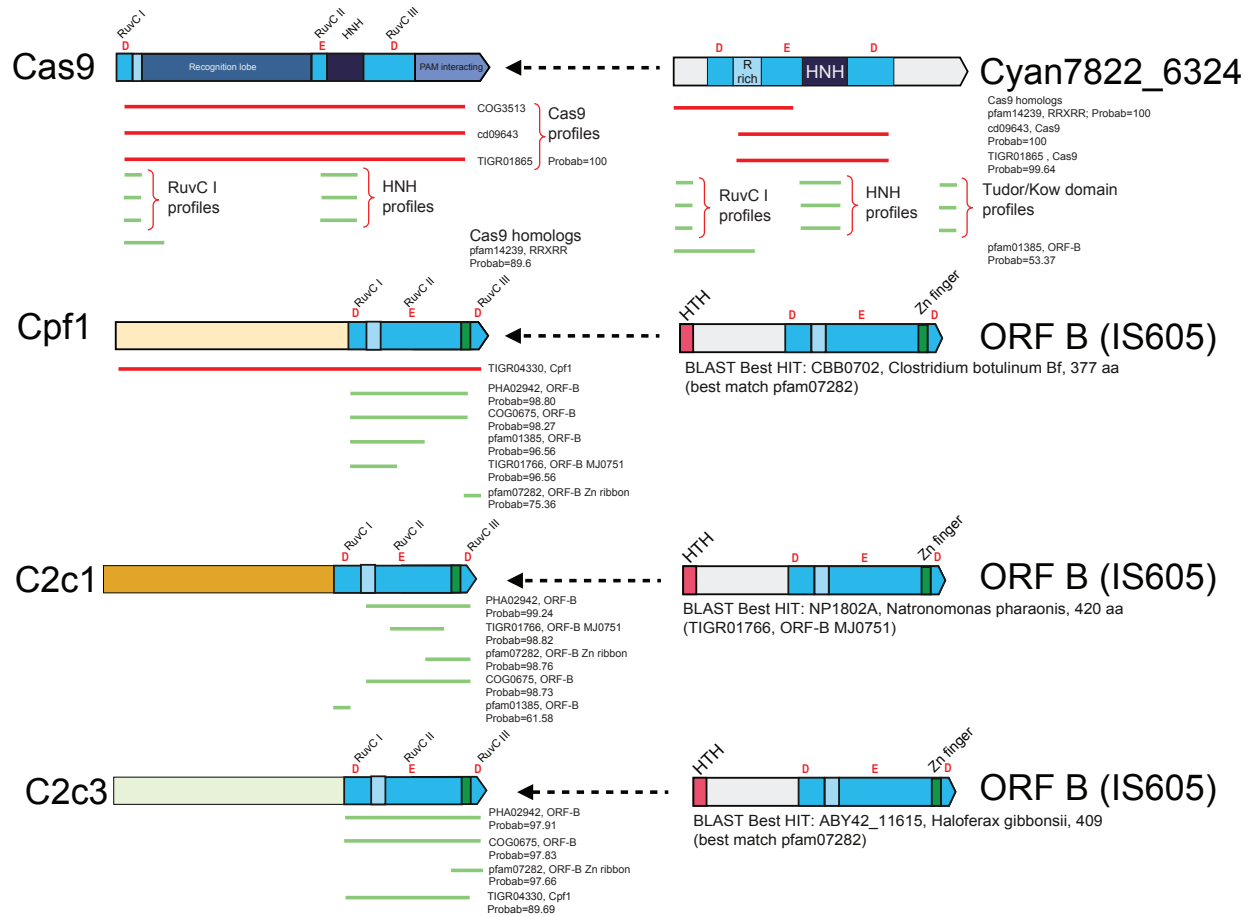

**Figure S3 | The closest homologs of the new type V effector proteins among the transposon-encoded proteins: non-overlapping sets of homologs.**





# FIGURE S4 (con't)

```
544884152_Alicyclobacillus_acidoterrestriis ---HFTGEFGGA---KIQCRRDQLA-----HMHR--RRGARDVYLNVSVRVQSQSE--ARGERRPYYAAVFRVLG---DNHRAFFVHF
652589596_Alicyclobacillus_contaminans ---LVFVAFGGA---KIQFNRAHLS-----AGYRKGVLASAGGGGSIYFNVTLDVQVNE-----RDVSKTFSFSD
652932497_Desulfovibrio_inopinatus ---QFAGLAGGA---EVLFRPYME-----HDERSEESLLERPQAVWFKLTLDVATQAP-----PNWLDGKGRVTR
667765471_Desulfonatronum_thiodismutans ---QFEGLLGGA---EILFDRKRIA-----NEQHGATDLASKPGHVVFKLTLDRVQAP-----QGWLDGKGRPAL
497199019_Opitutaceae_bacterium_TAV5 APLPTLPQDLTG---MPVFLMPDVT-----LSGERRILLNLPVTLPEAALVEQLGNAGRWQNFPGF-----SREDPFALR
654153037_Tuberibacillus_calidus ---ELKGTLLGGA---RIQFDREHLL---R-RQGVK--AGNVGRIFLNVTLNIEPMQPFPSRGNLQTSVQKALKVYV--DGYPKVNVFKPK
754485389_Bacillus_thermoamylovorans ---PLKGTLLGGA---RVQFDRDHLR---RYPHKVE--SGNVGRIYFNMTVNIETP-----ESPVSRSKLIHR--DDFPKVNFKPK
495056180_Brevibacillus_sp_Cf112 ---TFNHLGGA---KIQLERGDLE-----KEEKNFE--DGEIGSVYLNVDIFEPL-GEVKNRQVQAPYQGVQLLIRRPNEFPKVTYKSE
651512544_Bacillus_sp_NSP2-1 ---TFNHLGGA---KIQLERGDLE-----KEEKNFE--DGEIGSVYLNVDIFEPL-GEVKNRQVQAPYQGVQLLIRRPNEFPKVTYKSE
Secondary_structure_for_651512544_(Jpred) -----EEEEEE--E-----HH-----HHH-----EEEEEEEEEE--HH-----HHHHHHHHHH-----HHH
654874074_Desulfatirhabdium_butyraivorans ---NITGLFEQADWNGRLQAPRQQLAIAVVRDNPRLSEQERNLRMCGMIEHIRLWLVTFVSKLQPC-----GPWCAYAEQ-----HGLNTNPFQY
652569729_Alicyclobacillus_herbarius -----
652589403_Alicyclobacillus_contaminans -----
411770298_Citrobacter_freundii_ATCC_8090 -----
696372964_Citrobacter_freundii -----
492410745_Brevibacillus_agri -----
492410748_Brevibacillus_agri -----
495062547_Brevibacillus_sp_Cf112 -----
506407588_Methylobacterium_nodulans -----
219945206_Methylobacterium_nodulans_ORS_2060 -----
760065057_Methylobacterium_nodulans -----
CONSENSUS_0.8 -----
RuvC-like_motifs -----
544884152_Alicyclobacillus_acidoterrestriis DKLSDYLAEHPPDGKLGSEGLLSGLRVMSVDLGLRTSASISVFRVARKDLK-----PNSKGRVFFFFIKGND
652589596_Alicyclobacillus_contaminans RDLVSLKAEELKRYMETKPLQMPGVYRVMSVDLGVRYGAAISVFEVFKPFAEVR-----KDK-----LHYPTGCE
652932497_Desulfovibrio_inopinatus PVEVHFHTALSNSKSKHRTTLPQGLRVLSVDLQMRFTFACSVFELIEGKPEFG-----RAFFPADGR
667765471_Desulfonatronum_thiodismutans PPEAKHFHTALSNSKSFADQVRPGLRVLSVDLQMRFTFACSVFELVIRGGPDQ-----G-----TYFFPADGR
497199019_Opitutaceae_bacterium_TAV5 WPADGAVTKAGKTHIPWHQDRDHTYVLGVDLGRDAGALALLNVTAQKPAK-----PVHRI I
654153037_Tuberibacillus_calidus ELTEHIKESKNTLTLGVESLPTGLRVMSVDLQMRQAAASISFEVVEKPD-----DNK-----LFYVKDD
754485389_Bacillus_thermoamylovorans ELTEWIKDSKGGKLSKESLELIGLRVMSIDLQGRQAAASISFEVVEKPD-----EGK-----LFFPKGTE
495056180_Brevibacillus_sp_Cf112 QLVEWIKASPGHSA--GVESLASGFRVMSIDLGLRAAATSISFVSESSDKN-----AAD-----FSYWIEGTP
651512544_Bacillus_sp_NSP2-1 QLVEWIKASPGHSA--GVESLASGFRVMSIDLGLRAAATSISFVSESSDKN-----AAD-----FSYWIEGTP
Secondary_structure_for_651512544_(Jpred) HHHHHHH-----HHHHHHHHHH-----HHH-----EEEE-----EEEE
654874074_Desulfatirhabdium_butyraivorans WPHADTNRDRKHARLILPLPL-GLRVLSVDLGHRYAAACAVWEAVNTETVKEACQNVGRDMPKHEHDYLIHKVKKGIKQTEVDKTTIYRRI GADTLP
652569729_Alicyclobacillus_herbarius -----
652589403_Alicyclobacillus_contaminans -----
411770298_Citrobacter_freundii_ATCC_8090 -----
696372964_Citrobacter_freundii -----
492410745_Brevibacillus_agri -----
492410748_Brevibacillus_agri -----
495062547_Brevibacillus_sp_Cf112 -----
506407588_Methylobacterium_nodulans -----
219945206_Methylobacterium_nodulans_ORS_2060 -----
760065057_Methylobacterium_nodulans -----
CONSENSUS_0.8 -----
RuvC-like_motifs -----
544884152_Alicyclobacillus_acidoterrestriis N-----LVAVHERSQQLLKPGET-----ESKDLRAIEERQRTLRQLRTOQLAYLRLVRCGS-EDVGRR---ERSWAKIIEQPV
652589596_Alicyclobacillus_contaminans -----FVAHERSVLILKPGCE-----GVTAGQSQSERKQALAAIRAEMSILRKLWLRVSVQVTEEDRA-----KAVRGLLEDERG
652932497_Desulfovibrio_inopinatus SMDSPNKLMAKHERSFKLTLPGET-----PSRKEEERSIARAEYALKRDIQRKLSLRGLGEDNDNRR-----DALLEQFFKQWG
667765471_Desulfonatronum_thiodismutans TVDDEKTLMAKHERSFKTLPGEN-----PSRKEEIRARAAMEELRSIMGDIRRKLAILRLSVLQEDDPR-----THELRLPMAEIV
497199019_Opitutaceae_bacterium_TAV5 GEADGRTWYASLADAMIRLPGEDARLTVRQKLVQEPYGERGNASLEWEDARNIILRLGQNPDELGDPRHRSYPIENDKLLVALRAQARLARLQ
654153037_Tuberibacillus_calidus -----LEAVHRTSFNKLKPGKE-----RTERRMLEQKQKQDQATRLSRKLFKLVNVMQKLEKTDTER-----EKRVNRWIKDRE
754485389_Bacillus_thermoamylovorans -----LVAVHRSFNIKLKPGET-----LVKSREVLIRKAREDNKLMNQKLNFRNVHLFPQGFEDITER-----EKRVTKWISROE
495056180_Brevibacillus_sp_Cf112 -----LVAVHRSYMLRLKPGEQ-----VEKQVMEKRDREDFQLHQRVQFQIRVLAQIMRMAN-KQYGRD---WDELDSIKQAVE
651512544_Bacillus_sp_NSP2-1 -----LVAVHRSYMLRLKPGEQ-----VEKQVMEKRDREDFQLHQRVQFQIRVLAQIMRMAN-KQYGRD---WDELDSIKQAVE
Secondary_structure_for_651512544_(Jpred) -----EEEEEE-EEEE-----HHHHHHHHHHHHHHHHHHHHHHHHHHHHHHHHHH-----HHH-----HHHHHHHHHHHH
654874074_Desulfatirhabdium_butyraivorans DGRPHAPAPMARLDRQLIFLKLQGE-----EKDAREASNEEIALWQHMECKLDRTKPLIDRLIASWGGLL---KRQMARLDALKE
652569729_Alicyclobacillus_herbarius -----
652589403_Alicyclobacillus_contaminans -----
411770298_Citrobacter_freundii_ATCC_8090 -----
696372964_Citrobacter_freundii -----
492410745_Brevibacillus_agri -----
492410748_Brevibacillus_agri -----
495062547_Brevibacillus_sp_Cf112 -----
506407588_Methylobacterium_nodulans -----
219945206_Methylobacterium_nodulans_ORS_2060 -----
760065057_Methylobacterium_nodulans -----
CONSENSUS_0.8 -----
RuvC-like_motifs -----
544884152_Alicyclobacillus_acidoterrestriis DAANHMTDPDWEAFENELQK-----LKSLHGICSDKE-----W
652589596_Alicyclobacillus_contaminans GGWTMDPGEDSDHQPLQQL-----HEARLAVGELVNLVHLSFAEW-----
652932497_Desulfovibrio_inopinatus EEDVVPQQA-----FPRSLFQGLGAAPFRSTPELW-----
667765471_Desulfonatronum_thiodismutans DDPAKSA-----LNAEFLKGGGDDFRSTPELW-----
497199019_Opitutaceae_bacterium_TAV5 RSWRLDLAESDKALDEIHAERAGE-----KPSPLPLPLARDDAIKSTDEA-----
654153037_Tuberibacillus_calidus REENEP-----VYQDEFEM-----ISKVLY-SPHSV-----W
754485389_Bacillus_thermoamylovorans NSDVFL-----VYQDELQ-----IRELMY-KPYKD-----W
495056180_Brevibacillus_sp_Cf112 QKKSFLDQDRTFWEGIVCD-----LTKVLP-RNEAD-----W
651512544_Bacillus_sp_NSP2-1 QKKSFLDQDRTFWEGIVCD-----LTKVLP-RNEAD-----W
Secondary_structure_for_651512544_(Jpred) -----EEEE-----H-----
654874074_Desulfatirhabdium_butyraivorans LGWIPAPDSSENLSREDGEAKDYRESLAVDDLMFSAVRTLRLLALQRHGNPARIAYYLSSEVRIIPGGIQEKLDENGRIDLLQDALALWHELFPSPGWRDE
652569729_Alicyclobacillus_herbarius -----
652589403_Alicyclobacillus_contaminans -----
411770298_Citrobacter_freundii_ATCC_8090 -----
696372964_Citrobacter_freundii -----
492410745_Brevibacillus_agri -----
492410748_Brevibacillus_agri -----
495062547_Brevibacillus_sp_Cf112 -----
506407588_Methylobacterium_nodulans -----
219945206_Methylobacterium_nodulans_ORS_2060 -----
760065057_Methylobacterium_nodulans -----
CONSENSUS_0.8 -----
RuvC-like_motifs -----
```

# FIGURE S4 (con't)

544884152\_Alicyclobacillus\_acidoterrestris -----MDAVESVRRVWRHMGKQVRDRKDVRSGERPKIRGYADV-----V  
652589596\_Alicyclobacillus\_contaminans -----ERAVIERHRRLERITASHIRVFQTMKRVWGRNRNEDAAH-----T  
652932497\_Desulfovibrio\_inopinatus -----RQHCTYYDKAEACLAKHISDWRKRTRPRPTSREMYKTRSY-----H  
667765471\_Desulfonatronum\_thiodismutans -----KQCHFFHKDAEKVVAERFSRWRTRPKSSSWQDWRREGRYA-----  
497199019\_Opitutaceae\_bacterium\_TAV5 -----LLSQRDIIRRSFVQIANLILPLRGRWRWRPHVEVPDCHILA-----QSDPGTDDTKRLVAGO  
654153037\_Tuberibacillus\_calidus -----VDQLKSIHRKLEQLGKIEISKWRQSIQ--GRQG-----V  
754485389\_Bacillus\_thermoamylovorans -----VAFKQLHKKRLEVEIGKEVKHWRKSLSD--GRKG-----L  
495056180\_Brevibacillus\_sp\_Cf112 -----EQAVVQIHRKAEYVGVKAVQAWKRFAA--DERKG-----I  
651512544\_Bacillus\_sp\_NSP2-1 -----EQAVVQIHRKAEYVGVKAVQAWKRFAA--DERKG-----I  
Secondary\_structure\_for\_651512544\_(Jpred) -----HHHHHHHHHHHHHHHHHHHHHHHHHHHHHH-----  
654874074\_Desulfatirhabdium\_butyraetivorans AAKQLWDSRIATLAGYKPAEENGDNVSDVAYRKKQVYERQLRNVAKTLSGDVITCKELSDAWKERWEDEQRWKLRLWFKDWLPSGTQANNATIRNV  
652569729\_Alicyclobacillus\_herbarius -----  
652589403\_Alicyclobacillus\_contaminans -----  
411770298\_Citrobacter\_freundii\_ATCC\_8090 -----  
696372964\_Citrobacter\_freundii -----  
492410745\_Brevibacillus\_agri -----EQAVVQIHRKAEYVGVKAVQAWKRFAA--DERKG-----I  
492410748\_Brevibacillus\_agri -----  
495062547\_Brevibacillus\_sp\_Cf112 -----  
506407588\_Methylobacterium\_nodulans -----QDTCRAARLYRTEFGAVVSEWRSRTRSREDRK-----Y  
219945206\_Methylobacterium\_nodulans\_ORS\_2060 -----  
760065057\_Methylobacterium\_nodulans -----  
CONSENSUS\_0.8 -----  
RuvC-like\_motifs -----  
544884152\_Alicyclobacillus\_acidoterrestris GGNSEIQIEYLERQYKFLKSWSPFGYVSGQ-----VIRAEGKSR--FAITREHIDHAKEDRLKLLADRIIMEALGVYVALDERGKQKW-----  
652589596\_Alicyclobacillus\_contaminans GGISLAHIEHILQQRKLFIRKSWTHARTYGE-----VRLPKHEG--FAKRLQKHTNHVKEDRIKKLADMIVMAARGYRF--LDRKRAM-----V  
652932497\_Desulfovibrio\_inopinatus GGRKSWMLLEYLDVAVRLLKLSWLRGRTYGA-----INRQDTRFSGSLASRLHHSINSKEDRIKTGADSVIQAARGYIP--LPHGKGM-----  
667765471\_Desulfonatronum\_thiodismutans GGRKSWAVTYLEAVRGLILRWNRMRGTYGE-----VNRQDKQFGTVASALLHHINQLKEDRIKTGADMIQAARGYIP--RKNAGAV-----  
497199019\_Opitutaceae\_bacterium\_TAV5 RGISHERIEQIEKTRRQCSLNRLRHKPGERPVLGRPAKGEIADPCALLEKINRLRQDRVQDTAHAI LAAALGVRRLRAPSCKDRAER--RHRDIGHYI  
654153037\_Tuberibacillus\_calidus YGILSKNIEDIEKTRRLLFRWSMRPEPGE-----VRQLQPER--FAIDQNHNLHDKDRIKKLANQIIMVMTALGYRY--DGKRRKW-----C  
754485389\_Bacillus\_thermoamylovorans YGILSKNIDEIDTRKFLRWSLRPTPEGE-----VRLQPER--FAIDQNHNLHDKDRIKKLANQIIMVMTALGYRY--DGKRRKW-----C  
495056180\_Brevibacillus\_sp\_Cf112 AGLSMWNIIELEGRLKLLISWSRRSRNPQE-----VNRFERGHT--SHQRLTHIQNVKEDRLKQLSHAVMTALGYVY--DERKQEW-----Q  
651512544\_Bacillus\_sp\_NSP2-1 AGLSMWNIIELEGRLKLLISWSRRSRNPQE-----VNRFERGHT--SHQRLTHIQNVKEDRLKQLSHAVMTALGYVY--DERKQEW-----C  
Secondary\_structure\_for\_651512544\_(Jpred) -----HHHHHHHHHHHHHHHHHHHHHHHHHHHHHH-----  
654874074\_Desulfatirhabdium\_butyraetivorans GGLSLSLRATITTEFRKVVQGVFF--TRLRDP-----GTRHEIGEQ--FGQKTLDALELLRQRVQLASRIAEALGIG--SEGKQWGGGRPRQRIN  
652569729\_Alicyclobacillus\_herbarius -----  
652589403\_Alicyclobacillus\_contaminans -----  
411770298\_Citrobacter\_freundii\_ATCC\_8090 -----  
696372964\_Citrobacter\_freundii -----  
492410745\_Brevibacillus\_agri AGLSMWNIIELEGRLKLLISWSRRSRNPQE-----VNRFERGHT--SHQRLTHIQNVKEDRLKQLSHAVMTALGYVY--DERKQEW-----  
492410748\_Brevibacillus\_agri -----  
495062547\_Brevibacillus\_sp\_Cf112 -----  
506407588\_Methylobacterium\_nodulans AGKSMWSVQHITDVRRLQSWSLAGRASGD-----IRRLDRERGGVFAKDLDDHIDALKDDRLLKTGADLIVQAARGF--QRNEFGY-----W  
219945206\_Methylobacterium\_nodulans\_ORS\_2060 -----  
760065057\_Methylobacterium\_nodulans -----  
CONSENSUS\_0.8 -----  
RuvC-like\_motifs -----  
544884152\_Alicyclobacillus\_acidoterrestris VAKYPCQLIILLEELSEYQFNDRPSENNQLMWSHRGVFQELINQAQVHDLI-----VGTWYAASFSSFDARTGAPGIRCKRVF  
652589596\_Alicyclobacillus\_contaminans KTHAPCDLILFEDLSRYRFTMDRPPENSQLMWWSHRLEKVTYKMQAALFGIG-----VGTVPAFTSFDATGAPGIRCKRVF  
652932497\_Desulfovibrio\_inopinatus EORVEPCQLILFEDLSRYRFTMDRPPENSQLMWWSHRLEKVTYKMQAALFGIG-----VGTVPAFTSFDATGAPGIRCKRVF  
667765471\_Desulfonatronum\_thiodismutans VQVHEPCRLILFEDLSRYRFTMDRPPENSQLMWWSHRLEKVTYKMQAALFGIG-----VGTVPAFTSFDATGAPGIRCKRVF  
497199019\_Opitutaceae\_bacterium\_TAV5 ERFRAPADVVIENLSRYLSQDRASENTRLMQWCHRQIQVQLRQLCETYGIP-----VLAVPAAYSRSFSSRDGAGFRVHIT  
654153037\_Tuberibacillus\_calidus A-KHPACQIILFEDLSRYRFTMDRPPENSQLMWWSHRLEKVTYKMQAALFGIG-----VGTVPAFTSFDATGAPGIRCKRVF  
754485389\_Bacillus\_thermoamylovorans A-KNFAQCIILFEDLSRYRFTMDRPPENSQLMWWSHRLEKVTYKMQAALFGIG-----VGTVPAFTSFDATGAPGIRCKRVF  
495056180\_Brevibacillus\_sp\_Cf112 A-EYFACQIILFENLSQYRSNLRDSTKENSTLMKWAHRSIPKYVHMQAEPYGIQ-----IGDVRAEYSSRFYAKTGTGPGIRCKRVF  
651512544\_Bacillus\_sp\_NSP2-1 A-EYFACQIILFENLSQYRSNLRDSTKENSTLMKWAHRSIPKYVHMQAEPYGIQ-----IGDVRAEYSSRFYAKTGTGPGIRCKRVF  
Secondary\_structure\_for\_651512544\_(Jpred) -----EEEEH--H-----HHHHHHHHHHHHHHHHHHHHHHHHHHHHHH-----EEEE-----E  
654874074\_Desulfatirhabdium\_butyraetivorans DSRFAPCHAVVIENLANYRDETRTRLENRLMWTASAKVHKYLSAQCINGLY-----LCTVSAWYTSRQDSRTGAPGIRCKRVF  
652569729\_Alicyclobacillus\_herbarius -----  
652589403\_Alicyclobacillus\_contaminans -----  
411770298\_Citrobacter\_freundii\_ATCC\_8090 -----  
696372964\_Citrobacter\_freundii -----  
492410745\_Brevibacillus\_agri CAEYFACQIILFENLSQYRSNLRDSTKENSTLMKWAHRSIPKYVHMQAEPYGIQ-----IGDVRAEYSSRFYAKTGTGPGIRCKRVF  
492410748\_Brevibacillus\_agri -----  
495062547\_Brevibacillus\_sp\_Cf112 -----  
506407588\_Methylobacterium\_nodulans VQKHAPCHVILFEDLSRYRMTDRPPRENSQLMWAHRGVPMVGMQGEIYQIDRRDPDSARKHARQPLAAFLDTPAAFSSRYHASTMTGPIRCHPLR  
219945206\_Methylobacterium\_nodulans\_ORS\_2060 -----  
760065057\_Methylobacterium\_nodulans -----  
CONSENSUS\_0.8 -----  
RuvC-like\_motifs -----  
544884152\_Alicyclobacillus\_acidoterrestris ARCTQEHNPFPFWLNLKVF-----VEHTLDACPLRADD-----LIPTGEGEIVFSP--FSAEEDGFQIHADLNAAQLQRRRL  
652589596\_Alicyclobacillus\_contaminans KQDKKPTFWLI-----QFAEITGVNVTNVEPQ-----LIPVDGGEVFPSPKGPRAADGLKCVHADINAAHNLQRRF  
652932497\_Desulfovibrio\_inopinatus ERDFDNDLKPYPYLLRELSWMLGNKTV-----ESEEEKLRLSEKIRPGS-----LVPWDGGEQFATL--HPKRTQLCVHADNAAQLQRRF  
667765471\_Desulfonatronum\_thiodismutans EEDFDGDLPGMHLVGLDNLWLPKDKD-----RTANEARKLLGGMVRPGM-----LVPWDGGEQFATL--NAASQLHVIHADNAAQLQRRF  
497199019\_Opitutaceae\_bacterium\_TAV5 PDHRRMFWRSRI LARKLAHEEDGKRLKTVLDEARAVRGLFDRDRFNAGHVPKGPWRLLAPLFGPVFVL-----GDATPMQADLNAAIINALGI  
654153037\_Tuberibacillus\_calidus EHELYITEGGQVNRKFLD-----SL-----VENNIIEPDDARLEPGD-----LIRDQGGKQFATL--DERGELVITHADNAAQLQRRF  
754485389\_Bacillus\_thermoamylovorans K-----EKIQDNRFK-----NL-----QREGRLTDKIAVLKEDG-----LVPDKGGEKIFSL--SKDRKLVTHADNAAQLQRRF  
495056180\_Brevibacillus\_sp\_Cf112 GQDL-----GRRFENLQK-----RL-----VNEQFLTEEQVKLRPGD-----IVPDDSGELFMTLTDGSGSKEVFLQADINAAHNLQRRF  
651512544\_Bacillus\_sp\_NSP2-1 GQDL-----GRRFENLQK-----RL-----VNEQFLTEEQVKLRPGD-----IVPDDSGELFMTLTDGSGSKEVFLQADINAAHNLQRRF  
Secondary\_structure\_for\_651512544\_(Jpred) -----HH-----HH-----EEEE-----EEEEHHHHHHHHHHHHHHHHHHHHHHHHHHHHHH-----  
654874074\_Desulfatirhabdium\_butyraetivorans VREFMQSPFWKQVQKAEAKHDENK-----DARERFLCELNKTWAKTAPAEWKAGFVRIPLRGEVFSVA--DSKSPSARGIHADLNAAANIGLRAL  
652569729\_Alicyclobacillus\_herbarius -----  
652589403\_Alicyclobacillus\_contaminans -----  
411770298\_Citrobacter\_freundii\_ATCC\_8090 -----  
696372964\_Citrobacter\_freundii -----  
492410745\_Brevibacillus\_agri GQDL-----GRRFENLQK-----RL-----VNEQFLTEEQVKLRPGD-----IVPDDSGELFMTLTDGSGSKEVFLQADINAAHNLQRRF  
492410748\_Brevibacillus\_agri -----  
495062547\_Brevibacillus\_sp\_Cf112 -----  
506407588\_Methylobacterium\_nodulans KREFEDQGFLELLKREM-----EGLDLNGYKPGD-----LVPLPGGEVFCVL--NANGLSRIHADINAAQLQRRF  
219945206\_Methylobacterium\_nodulans\_ORS\_2060 -----  
760065057\_Methylobacterium\_nodulans -----  
CONSENSUS\_0.8 -----  
RuvC-like\_motifs -----  
P...G...F.....AD.NAA.N...R...  
-----D-----

## FIGURE S4 (con't)

```

544884152_Alicyclobacillus_acidoterrestris          SDFDISQIRLRCWGEVDGELVLPLRLTGKRT-----ADSYSNKVFYNTGVTYERERGKRRKRVFAQEKLESEEAELLVEADE
652589596_Alicyclobacillus_contaminans             IP---RLPSVKRCRRVVEAEGFAAVPSSAFMKVHGKG-----AFVSDVDFEYEQKGRVAV---NRADRTSSTLDEDEGDI GEEMLVSN
652932497_Desulfovibrio_inopinatus                 GRCG-EAFRLVCPHGDDVLRLASTPGARLLGALQQL-----ENGQGAFLVDRMGSTSQMNRVFMKLGKKIKPLQDNNGDDELDVLSVLPPE
667765471_Desulfonatronum_thiodismutans           GRCG-EAIRIVCNQLSDVGSSTRYEMAKAPKARLLGALQQLKNGDAPPHLTSIPNSQKPNYSVMTPTNAGKKYRAGPGEKSSGEE--DELALDIVEQAE
497199019_Opitutaceae_bacterium_TAV5              AAP--DRHDIHHRRAENKRLSLR-----LGTQREKARWPGGAPAVTLSTPNNGASPEDSDALPERVSNLFVDIAGV
654153037_Tuberibacillus_calidus                   TRTH-GLYRIRCESREIKDVAVLPSSDKDQKEMENL-----FGIGYLQPFKQENDVYKVVGKEKIG--KKTSSQSDKELV-SEILQEASVMADE
754485389_Bacillus_thermoamylovorans              TRTH-GFYKVVYCKAVQVDGQTVYIPESKDKQKIIE-----FGEGY--FILKDGVEWGNAGKLI--KKGSSQSSSELVSDILKDSFDLASE
495056180_Brevibacillus_sp_Cf112                  QRYN-ELFKVSCRIVRDEEYLVPKTKSVQAKLKGK-----LFVKKS--DTAWKDVYVWDSQAKLKG--KTTFTTEESPEQ-LEDFQEIIEEAE
651512544_Bacillus_sp_NSP2-1                      QRYN-ELFKVSCRIVRDEEYLVPKTKSVQAKLKGK-----LFVKKS--DTAWKDVYVWDSQAKLKG--KTTFTTEESPEQ-LEDFQEIIEEAE
Secondary_structure_for_651512544_(Jpred)         H-----EE--EEEE--EEEE--HHHHH-----EEE-----EEEE--HH-----HEHH-----HH-HHHHHHHHHHHH
654874074_Desulfatirhabdium_butyrativorans       TDP-----DWPQKVVVPCD-----PVSESKMDYVKCAAVKVGQPLRPAQTADGAASKIRKGGKNTAG
652589403_Alicyclobacillus_contaminans           -----
652589403_Alicyclobacillus_contaminans           -----
411770298_Citrobacter_freundii_ATCC_8090          -----
696372964_Citrobacter_freundii                    -----
492410745_Brevibacillus_agri                      -----
492410745_Brevibacillus_agri                      -----
495062547_Brevibacillus_sp_Cf112                  -----
506407588_Methylobacterium_nodulans                -----
219945206_Methylobacterium_nodulans_ORS_2060     TQHG-DAFRLPCGSAVQGIIRWAPLSMGKRQAGALG-----GFGYLEPTGHDSSGCRKRTAEAWRRLSQAQKDRDEAAAAAEEDEELQGLEEELE
760065057_Methylobacterium_nodulans              -----
CONSENSUS_0.8                                     .....
RuvC-like_motifs                                  .....

544884152_Alicyclobacillus_acidoterrestris          AREKSVVLMRDPGGIINRNG---WTRQKEFWSM/NQRIEGLVQIIRSVPLQDSACENTGDI-----
652589596_Alicyclobacillus_contaminans             GAGEFVRMFYDESQVYGYG---RWMSKVFQKVRQIVHRAIQDQVEKRAAARGENGATSSR-----
652932497_Desulfovibrio_inopinatus                 DDTGRIITVFRDSSGIFPCPN---VWIPAKQFPAWRAMIKVMASHLSG-----
667765471_Desulfonatronum_thiodismutans           LAQGRKTFTRDPSGVFFPAD---RWLPSEIYWSRIRRRIRWQVTLERNSSGRQERAEEMDEMPY-----
497199019_Opitutaceae_bacterium_TAV5              ANFERVTIEGVSQ-----KPAFRGLWASVKQRAWNRVARLNTVTDNNRNEEEDDIPM-----
654153037_Tuberibacillus_calidus                   LKGNRKTFRDPSGVVFPKD---RWYTGGRYFGLTEHLKRLAER---RLFDGSSRRGLFNGTDSNTNVE
754485389_Bacillus_thermoamylovorans              LKGEKMLFRDPSGNVFPD---KWAAGVYFGKLERLILSKLTNQYSISTIEDSSKQSM-----
495056180_Brevibacillus_sp_Cf112                  AKGTYRTLFRDPSGVFFPES---WVYQKDFWGEVKKRKYGKLRERFLTKAR-----
651512544_Bacillus_sp_NSP2-1                      AKGTYRTLFRDPSGVFFPES---WVYQKDFWGEVKKRKYGKLRERFLTKAR-----
Secondary_structure_for_651512544_(Jpred)         ---EEEEEE---EEE-----HHHHHHHHHHHHHHHHHHHH
654874074_Desulfatirhabdium_butyrativorans       TSKEKVLWRDISAPPLESNEIGEWKETSAYQNDVQYRIVRLKEHIKSLDNRGTGDNVEG-----
652589403_Alicyclobacillus_contaminans           -----
652589403_Alicyclobacillus_contaminans           -----
411770298_Citrobacter_freundii_ATCC_8090          -----
696372964_Citrobacter_freundii                    -----
492410745_Brevibacillus_agri                      -----
492410745_Brevibacillus_agri                      -----
495062547_Brevibacillus_sp_Cf112                  -----
506407588_Methylobacterium_nodulans                -----
219945206_Methylobacterium_nodulans_ORS_2060     RSGERVVFRDPSGVVLPD---LWFPAAFWIVRAKTVGRILRSHLDAQEASAYAAAGL-----
760065057_Methylobacterium_nodulans              -----
CONSENSUS_0.8                                     .....
RuvC-like_motifs                                  .....

```

### Figure S4. Multiple alignment of C2c1 protein family.

The alignment was built using MUSCLE program and modified manually on the basis of local PSI-BLAST pairwise alignments. Each sequence is labelled with GenBank Identifier (GI) number and systematic name of an organism. Secondary structure was predicted by Jpred and shown underneath the sequence which was used as a query (designations: H- alpha helix, E – beta strand). CONSENSUS was calculated for each alignment column by scaling the sum-of-pairs score within the column between those of a homogeneous column (the same residue in all aligned sequences) and a random column with homogeneity cutoff 0.8. Active site motifs of RuvC-like domain are shown below alignment.















**FIGURE S7 (Related to Figures 3 and 4)**

**A**

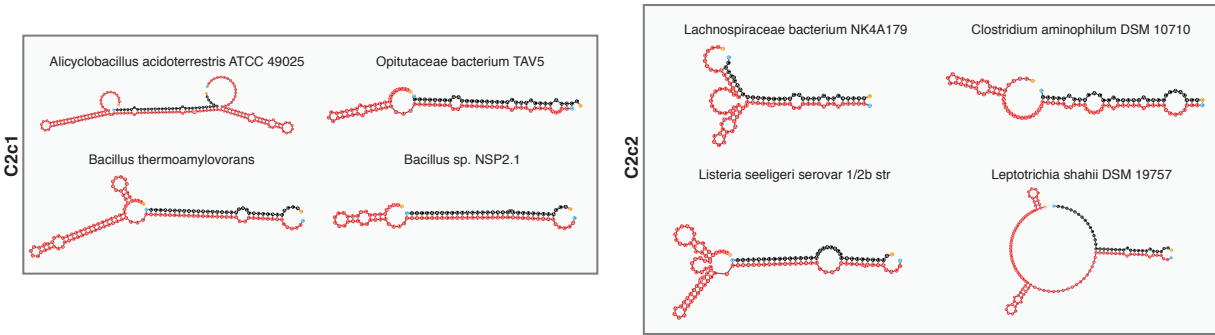

**B**

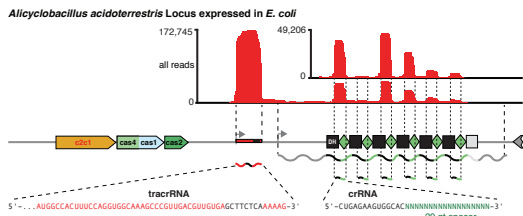

**C**

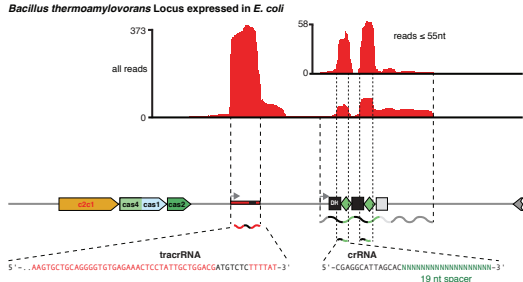

**F**

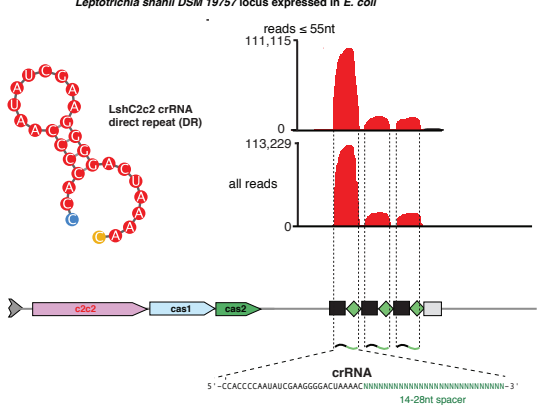

**D**

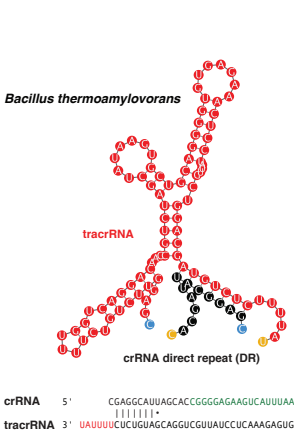

**E**

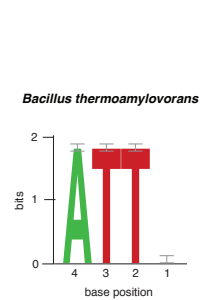

**G**

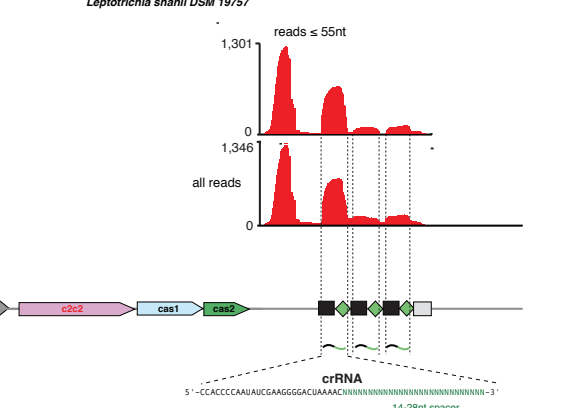

**Figure S7. Additional functional validation off type V-B (C2c1 loci) and type VI (C2c2 loci) CRISPR-Cas systems.**

**(A)** Predicted structures of tracrRNAs base-paired with the repeats. TracrRNA for *Alicyclobacillus acidoterrestris* was identified using RNAseq. For the remaining loci, putative tracrRNAs were identified based on presence of an anti-direct repeat (DR) sequence. Anti-DRs were identified using Geneious ([www.geneious.com](http://www.geneious.com)) by searching for sequences within each respective CRISPR locus that are highly homologous to DR. The 5' and 3' ends of each putative tracrRNA was determined through computational prediction of bacterial transcription start and termination sites using BPROM ([www.softberry.com](http://www.softberry.com)) and ARNOLD ([rna.igmors.u-psud.fr/toolbox/arnold/](http://rna.igmors.u-psud.fr/toolbox/arnold/)) respectively. Co-folding predictions were generated using Geneious. 5' ends are colored blue and 3' ends are colored orange.

**(B)** Heterologous expression of the *Alicyclobacillus acidoterrestris* C2c1 locus in pACYC-184 transformed into *E. coli* shows identical results to the expression observed in the endogenous strain (Fig. 4A). Processed crRNAs have a 5' 14-nt DR and 20-nt spacer and a putative 79-nt tracrRNA is expressed robustly.

**(C)** The *Bacillus thermoamylovorans* locus was heterologously expressed in *E. coli*. The putative tracrRNA is significantly expressed and is processed to 91 nt. Processed crRNAs are also present with a 5' 14 nt DR and 19nt spacer.

**(D)** In silico co-folding of the crRNA direct repeat and putative tracrRNA shows stable secondary structure and complementarity between the two RNAs. 5' bases are colored blue and 3' bases are colored orange.

**(E)** Depletion from the 5' left PAM library reveals a 5' ATTN PAM. Depletion is measured as the negative log<sub>2</sub> fold ratio and PAMs above a threshold of 3.5 are used to calculate the entropy score at each position.

**(F)** RNA-sequencing of the *Leptotrichia shahii* DSM 19757 locus expressed in *E. coli* shows processing of the CRISPR array in the 3' to 5' direction (direction of the locus). crRNAs are processed to have a 5' DR that is 28nt in length and spacers with lengths 14-28nt. *Inset:* In silico folding of the *L. shahii* crRNA DR predicts stable secondary structure.

**(G)** RNA-sequencing of the endogenous *Leptotrichia shahii* DSM 19757 C2c2 locus shows similar results to (A).



**Table S1 (related to Figure 1)**

**The discovered Class 2 CRISPR-Cas loci.** Please see accompanying Excel spreadsheet.

## **SUPPLEMENTAL EXPERIMENTAL PROCEDURES**

### **Computational sequence analysis**

The multiple alignments of the C2c1, C2c2, C2c3 and Cas1 proteins in the Fasta format and the complete phylogenetic tree for Cas1 proteins in the Newick format are available at [ftp://ftp.ncbi.nih.gov/pub/wolf/\\_suppl/Class2/](ftp://ftp.ncbi.nih.gov/pub/wolf/_suppl/Class2/).

### **Growth of Bacterial Strains**

For RNA-sequencing, *Alicyclobacillus acidoterrestris*(ATCC) was cultured using ATCC Medium 1655 in suspension at 50°C and 300 rpm. *E. coli* containing heterologous constructs were cultured in Luria broth supplemented with appropriate antibiotics in suspension at 37°C and 300rpm. Both strains were grown in aerobic conditions and harvested in stationary growth phase.

For the PAM screen, *E. coli* were grown on LB-agar plates supplemented with ampicillin and the appropriate antibiotics (chloramphenicol or kanamycin) for maintenance of the C2c1 locus plasmid at 37°C.

### **Generation of heterologous plasmids**

To generate the AacC2c1 locus for heterologous expression, genomic DNA was purified from *Alicyclobacillus acidoterrestris* using the Qiagen DNeasy Blood and Tissue kit and the C2c1 locus was PCR amplified for cloning into pACYC-184. The BthC2c1 and LseC2c2 locus was synthesized by Genscript into a pET-28 vector. Cells harboring plasmids were made competent using the Z-competent kit (Zymo).

### **RNA extraction and Northern blotting**

The procedure was performed essentially as described previously (Pougach and Severinov, 2012). *E. coli* BL21 AI cells were transformed with plasmids pACYCduet-1 containing, under inducible T7 promoters, *A. ac.* or *L. sh.* cas operons and plasmids pCDF-1b containing the respective minimal CRISPR cassettes with single spacers. Total RNA was extracted from 5 mL of *E. coli* cells induced with 1 mM arabinose/0.2 mM IPTG and grown until OD<sub>600</sub> 0.8 – 1.0. The cells were lysed by 5-minute treatment using Max Bacterial Enhancement Reagent followed by RNA purification with the TRIzol reagent (Thermo Fisher Scientific). 15 mg of total RNA were

separated on a denaturing 8 M urea - 12% polyacrylamide gel and electrophoretically transferred to Hybond-XL membrane (GE Healthcare) using a Mini Trans-Blot Electrophoretic Transfer Cell (Bio-Rad). The membrane was dried and then UV cross-linked. ExpHyb hybridization solution (Clontech) was used for hybridization according to manufacturer's instructions for 1 hour at 40 °C with <sup>32</sup>P-end labeled oligonucleotide probes.

### Preparation of C2c1 Protein Lysate

C2c1 proteins codon optimized for human expression and designed with an N-terminal nuclear localization tag. The protein sequences were synthesized and cloned into the pcDNA3.1 expression plasmid by Genscript. Using Lipofectamine 2000 reagent (Life Technologies), 2,000ng of the expression plasmids were transfected into HEK293FT cells (6-well plates at 90% confluence). After 48 hours, cells were washed with DPBS (Left Technologies), lysed using lysis buffer [20mM Hepes pH 7.5, 100mM KCl, 5mM MgCl<sub>2</sub>, 1 mM DTT, 5% glycerol, 0.1% Triton X-100, 1X cComplete Protease Inhibitor Cocktail Tablets (Roche)]. After sonicating for 10 minutes in a Biorupter sonicators (Diagenod) (50% duty cycle on high), the lysate was centrifuged and the supernatant was frozen at -80°C for later use in cleavage assays.

### Primers used in this work

| Primer Description                                          | Sequence (5' to 3')                                                                                        |
|-------------------------------------------------------------|------------------------------------------------------------------------------------------------------------|
| <i>PAM library generation</i>                               |                                                                                                            |
| Oligo for 5' AacC2c1 PAM library (forward)                  | ggccagtgaattcgagctcggtagccgggNNNNNNNtgttggtaaagg<br>taaaaagacgaatgatgcatccagcttggcgtaatcatggatagctg<br>tt  |
| Oligo for 3' AacC2c1 PAM library (forward)                  | ggccagtgaattcgagctcggtagccgggtgttggtaaaggtaaaaag<br>acgaatgatgcatccNNNNNNNagcttggcgtaatcatggatagctg<br>tt  |
| Oligo for 5' BsC2c1 PAM library (forward)                   | ggccagtgaattcgagctcggtagccgggNNNNNNNcggggagaagtca<br>ttaaataaggccactgttaaaaagcttggcgtaatcatggatagctg<br>tt |
| Oligo for 3' BsC2c1 PAM library (forward)                   | ggccagtgaattcgagctcggtagccggggagaagtcatttaaataaggc<br>cactgttaaaaNNNNNNNNagcttggcgtaatcatggatagctgttt      |
| Oligo for reverse strand synthesis of PAM library (reverse) | AAACAGCTATGACCATGATTACGCCAA                                                                                |
| <i>Northern Blot Probes</i>                                 |                                                                                                            |

|                                                 |                                             |
|-------------------------------------------------|---------------------------------------------|
| Aac_tracrRNA_probe1                             | tctttttgagaagctcaacggg                      |
| Aac_crRNA_probe2                                | cctttaccaaacagtgccacttctcagatcgctc          |
| Aac_crRNA_probe3                                | tcagtgatccgacggatgcatcattcgctttttacc        |
| Lsh_crRNA_probe1                                | ggtagaacagcaatctagtttttagtccccttcgat        |
| Lsh_crRNA_probe2                                | attgggggtggtctatatcaatatggattacttggg        |
| Lsh_crRNA_probe3                                | atcgaaggggactaaaactagattgctggttctacc        |
| Lsh_crRNA_probe4                                | accaagtaatccatattgatatagaccacccaat          |
| <i>Cloning</i>                                  |                                             |
| Aac_cas_Nco_d                                   | acgtccatggcgtcaaataccatcaaagtg              |
| Aac_cas_Kpn_r                                   | cgtaggtacctcaaaataccaatcccttcaaataccaatgg   |
| Aac_cas_Nde_d                                   | cagctggctcatatgcaccgacg                     |
| Aac_cas_Nde_r                                   | cgtcggtgcatatgagccagctg                     |
| AacC2c1 PAM<br>Validation Target TTT<br>Forward | ctagTTttgtttggttaaaggtaaaaagacgaatgatgcatcc |
| AacC2c1 PAM<br>Validation Target TTA<br>Forward | ctagTtatgtttggttaaaggtaaaaagacgaatgatgcatcc |
| AacC2c1 PAM<br>Validation Target TTC<br>Forward | ctagTTctgtttggttaaaggtaaaaagacgaatgatgcatcc |
| AacC2c1 PAM<br>Validation Target TTG<br>Forward | ctagTTgtgtttggttaaaggtaaaaagacgaatgatgcatcc |
| AacC2c1 PAM<br>Validation Target GGA<br>Forward | ctagGgatgtttggttaaaggtaaaaagacgaatgatgcatcc |
| AacC2c1 PAM<br>Validation Target TTT<br>Reverse | agctggatgcatcattcgctctttttacctttaccaaacaaaa |
| AacC2c1 PAM<br>Validation Target TTA<br>Reverse | agctggatgcatcattcgctctttttacctttaccaaacataa |
| AacC2c1 PAM<br>Validation Target TTC<br>Reverse | agctggatgcatcattcgctctttttacctttaccaaacagaa |
| AacC2c1 PAM<br>Validation Target TTG<br>Reverse | agctggatgcatcattcgctctttttacctttaccaaacacaa |
| AacC2c1 PAM<br>Validation Target GGA<br>Reverse | agctggatgcatcattcgctctttttacctttaccaaacatcc |

| <i>crRNA/tracrRNA IVT</i>                |                                                                                                                                                                     |
|------------------------------------------|---------------------------------------------------------------------------------------------------------------------------------------------------------------------|
| AacC2c1 crRNA targeting EMX1 target 1    | gaaatTAATACGACTCACTATAGGGCGAGCGATCTGAGAAGTGGCACCA<br>GAACCGGAGGACAAAGTA                                                                                             |
| AacC2c1 crRNA targeting AacC2c1 spacer 1 | gaaatTAATACGACTCACTATAGGGCGAGCGATCTGAGAAGTGGCACTG<br>TTTGGTAAAGGTAAAAAG                                                                                             |
| AacC2c1 tracrRNA 151nt                   | GTCTAGAGGACAGAATTTTTCAACGGGTGTGCCAATGGCCACTTTCCAG<br>GTGGCAAAGCCCCTTGAGCTTCTCAAAAAGAACGCTCGCTCAGTGTCT<br>GACCTTTTCGAGCGCCTGTTTCAGGGCGAAAACCTGGGAGGCGCTCGAAT<br>CATA |
| AacC2c1 tracrRNA 96nt                    | GTCTAGAGGACAGAATTTTTCAACGGGTGTGCCAATGGCCACTTTCCAG<br>GTGGCAAAGCCCCTTGAGCTTCTCAAAAAGAACGCTCGCTCAGTGT                                                                 |
| AacC2c1 tracrRNA 90nt                    | GTCTAGAGGACAGAATTTTTCAACGGGTGTGCCAATGGCCACTTTCCAG<br>GTGGCAAAGCCCCTTGAGCTTCTCAAAAAGAACGCTCGCTC                                                                      |
| AacC2c1 tracrRNA 78nt                    | GTCTAGAGGACAGAATTTTTCAACGGGTGTGCCAATGGCCACTTTCCAG<br>GTGGCAAAGCCCCTTGAGCTTCTCAAAA                                                                                   |
| AacC2c1 tracrRNA 67nt                    | GTCTAGAGGACAGAATTTTTCAACGGGTGTGCCAATGGCCACTTTCCAG<br>GTGGCAAAGCCCCTTGAG                                                                                             |
| AacC2c1 sgRNA targeting EMX1 target 1    | gaaatTAATACGACTCACTATAGGGGTCTAGAGGACAGAATTTTTCAAC<br>GGGTGTGCCAATGGCCACTTTCCAGGTGGCAAAGCCCCTTGAGCTTCTC<br>AAATCTGAGAAGTGGCACCAGAACCGGAGGACAAAGTA                    |
| AacC2c1 sgRNA targeting AacC2c1 spacer 1 | gaaatTAATACGACTCACTATAGGGGTCTAGAGGACAGAATTTTTCAAC<br>GGGTGTGCCAATGGCCACTTTCCAGGTGGCAAAGCCCCTTGAGCTTCTC<br>AAATCTGAGAAGTGGCACTGTTTGGTAAAGGTAAAAAG                    |

### Plasmid and codon-optimized C2c1/C2c2 protein-coding sequences used in this work

| <b>Constructs used for RNA-sequencing, Bacterial Interference, and Lysate Cleavage</b> |                                                                                           |
|----------------------------------------------------------------------------------------|-------------------------------------------------------------------------------------------|
| <i>C2c1 locus constructs</i>                                                           | <i>Permanent Sequence Links</i>                                                           |
| AacC2c1 locus cloned in pACYC184                                                       | <a href="https://benchling.com/s/YfJMfbu2/edit">https://benchling.com/s/YfJMfbu2/edit</a> |
| BtC2c1 locus in pET28a                                                                 | <a href="https://benchling.com/s/7SJzEUPG/edit">https://benchling.com/s/7SJzEUPG/edit</a> |
|                                                                                        |                                                                                           |
| <i>C2c2 locus constructs</i>                                                           |                                                                                           |
| LshC2c2 locus cloned in pACYC184                                                       | <a href="https://benchling.com/s/gco8u7H8/edit">https://benchling.com/s/gco8u7H8/edit</a> |
| LseC2c2 locus cloned in pET28a                                                         | <a href="https://benchling.com/s/3NojkRem/edit">https://benchling.com/s/3NojkRem/edit</a> |
|                                                                                        |                                                                                           |

|                                              |                                                                                           |
|----------------------------------------------|-------------------------------------------------------------------------------------------|
| <i>C2c1 human codon optimized constructs</i> |                                                                                           |
| AacC2c1 Human Codon Optimized Protein        | <a href="https://benchling.com/s/WivDaYfG/edit">https://benchling.com/s/WivDaYfG/edit</a> |
|                                              |                                                                                           |
| <b>Constructs used for Northern Blotting</b> |                                                                                           |
| AacC2c1 and Cas genes in pACYCduet           | <a href="https://benchling.com/s/wgbYgHeZ/edit">https://benchling.com/s/wgbYgHeZ/edit</a> |
| AacC2c1 CRISPR array in pCDF                 | <a href="https://benchling.com/s/kjfElooT/edit">https://benchling.com/s/kjfElooT/edit</a> |
|                                              |                                                                                           |
| LshC2c2 and Cas genes in pACYCduet           | <a href="https://benchling.com/s/mFzf1E7u/edit">https://benchling.com/s/mFzf1E7u/edit</a> |
| LshC2c2 CRISPR array in pCDF                 | <a href="https://benchling.com/s/v26xY1KC/edit">https://benchling.com/s/v26xY1KC/edit</a> |

## SUPPLEMENTAL REFERENCES

Pougach, K., and Severinov, K. (2012). Use of semi-quantitative Northern blot analysis to determine relative quantities of bacterial CRISPR transcripts. *Methods Mol Biol* 905, 73-86.
